# Supplementary material for: Primate tarsal bones from Egerkingen, Switzerland, attributable to the middle Eocene adapiform Caenopithecus lemuroides
Source: PeerJ. 2015 Jun 23;3:e1036. doi: 10.7717/peerj.1036 (PMC4485257; doi:10.7717/peerj.1036)
Supplement: Appendix S1 [file peerj-03-1036-s001.xlsx]

## Sheet: Sheet1
Note that grey rows contain input variables for regressions
Genus and species	Specimen number	n/species	Trochlear width (mm)	ln(Trochlear width)	Cuboid facet width (mm)	Cuboid facet depth (mm)	ln (Cuboid facet area)	m2 mesiodistal length (mm)	m2 buccolingual width (mm)	ln m2 area
Archaeolemur sp.	DPC 9905	1	12.47	2.52333	14.48	9.23	4.89523	8.74	8.68	4.32893
Arctocebus calabarensis	AMNH 207949		2.76	1.01523	3.21	1.8	1.75406	3.36	2.49	2.12422
Arctocebus calabarensis	AMNH 212576		2.91	1.06815	2.96	1.92	1.73751	3.37	2.58	2.1627
Arctocebus calabarensis mean		2	2.835	1.04169	3.085	1.86	1.74579	3.365	2.535	2.14346
Avahi laniger	USNM 83650		5.03	1.61542	5.45	4.32	3.15887	3.91	2.83	2.40381
Avahi laniger	USNM 83652		5.66	1.73342	5.61	4.39	3.20388	4.17	3.04	2.53977
Avahi laniger	AMNH 170461		5.1	1.62924	5.29	4.37	3.14058	3.8	3.05	2.45014
Avahi laniger mean		3	5.26333	1.65936	5.45	4.36	3.16778	3.96	2.97333	2.46458
Cheirogaleus major	AMNH 100640	1	3.89	1.35841	3.38	2.38	2.08498	3.15	2.73	2.1517
Cheirogaleus medius	DPC 1023		2.67	0.982078	2.61	1.85	1.57454	2.52	1.87	1.5502
Cheirogaleus medius	DPC 031		2.68	0.985817	2.53	1.83	1.53254	2.54	2.1	1.6741
Cheirogaleus medius	DPC 1010		2.53	0.928219	2.58	1.83	1.55211	2.46	2.01	1.5983
Cheirogaleus medius mean		3	2.62667	0.965372	2.57333	1.83667	1.55306	2.50667	1.99333	1.60753
Cynocephalus volans	FMNH 61032		5.2	1.64866	5.3	3.85	3.01578	3.99	3.67	2.68398
Cynocephalus volans	BAA NN		5.075	1.62433	4.525	3.655	2.80571	3.91	3.49	2.61344
Cynocephalus volans mean		2	5.1375	1.63649	4.9125	3.7525	2.91075	3.95	3.58	2.64871
Daubentonia madagascariensis	AMNH 185643	1	6.605	1.88783	7.74	4.99	3.65384	4.85	3.88	2.93481
Eulemur fulvus fulvus	AMNH 31254	1	6.71	1.9036	6.43	4.54	3.3739	6.06	3.7	3.11004
Eulemur fulvus rufus	DPC 0101		5.95	1.78339	6.61	5.17	3.53146	6.02	3.56	3.06485
Eulemur fulvus rufus	DPC 0104		6.79	1.91545	7.24	6.28	3.81699	5.97	3.96	3.16299
Eulemur fulvus rufus mean		2	6.37	1.84942	6.925	5.725	3.67422	5.995	3.76	3.11392
Eulemur mongoz	AMNH 17403	1	5.49	1.70293	5.7	4.64	3.27518	5.36	3.47	2.92312
Euoticus elegantulus	AMNH 269914	1	3.49	1.2499	3.27	2.57	2.1287	2.43	1.81	1.48122
Galago senegalensis	AMNH 119521		3.1	1.1314	2.6	2.58	1.9033	2.21	1.81	1.38632
Galago senegalensis	AMNH 244100		3.526	1.26016	2.8	2	1.72277	2.38	2.08	1.59947
Galago senegalensis mean		2	3.313	1.19578	2.7	2.29	1.81303	2.295	1.945	1.49289
Galagoides demidoff	AMNH 212958		--	--	1.75	1.21	0.750236	--	--	--
Galagoides demidoff	AMNH 150413 L		2.07	0.727549	--	--	--	--	--	--
Galagoides demidoff	AMNH 212956		2	0.693147	2.15	1.42	1.11612	--	--	--
Galagoides demidoff	AMNH 212957 L		2.11	0.746688	--	--	--	--	--	--
Galagoides demidoff	AMNH 215180 L		2.22	0.797507	--	--	--	--	--	--
Galagoides demidoff	AMNH 241121 L		2.21	0.792993	2.17	1.43	1.1324	--	--	--
Galagoides demidoff	AMNH 241121 R		2.23	0.802002	--	--	--	--	--	--
Galagoides demidoff	AMNH119810		--	--	--	--	--	1.68	1.44	0.883437
Galagoides demidoff	AMNH 241124		--	--	--	--	--	2.04	1.57	1.16403
Galagoides demidoff	AMNH 239438		--	--	--	--	--	2.01	1.76	1.26345
Galagoides demidoff mean		3,6,3	2.14	0.759981	2.02333	1.35333	0.999587	1.91	1.59	1.10364
Hapalemur griseus griseus	AMNH 170689		4.795	1.56757	4.53	3.39	2.73155	4.91	3.86	2.94194
Hapalemur griseus griseus	AMNH 61589		4.68	1.5433	4.86	2.86	2.63186	4.52	3.32	2.70848
Hapalemur griseus griseus mean		2	4.7375	1.55544	4.695	3.125	2.68171	4.715	3.59	2.82521
Indri indri	AMNH 100504	1	9.384	2.23901	9.15	7.69	4.25367	7.17	5.27	3.63194
Lemur catta	AMNH 22912		6.33	1.8453	7.3	4.52	3.49639	5.12	3.68	2.93607
Lemur catta	AMNH 170739		7.83	2.05796	7.58	4.46	3.52066	5.16	3.61	2.92464
Lemur catta mean		2	7.08	1.95163	7.44	4.49	3.50852	5.14	3.645	2.93036
Lepilemur mustelinus leucopus	AMNH 170569		4.224	1.44078	4.73	3.25	2.73258	3.46	2.17	2.016
Lepilemur mustelinus leucopus	AMNH 170568		4.837	1.57629	4.7	3.25	2.72622	3.56	2.5	2.18605
Lepilemur mustelinus leucopus	AMNH 170556		4.51	1.5063	4.53	3.54	2.77485	3.78	2.45	2.22581
Lepilemur mustelinus leucopus	AMNH 170559		4.257	1.44856	4.53	2.86	2.56154	3.87	2.36	2.21192
Lepilemur mustelinus leucopus	AMNH 170560		4.688	1.54501	4.51	3.13	2.64733	3.86	2.55	2.28676
Lepilemur mustelinus leucopus	AMNH 170565		3.841	1.34573	3.6	2.8	2.31055	3.32	2.35	2.05438
Lepilemur mustelinus leucopus mean		6	4.39283	1.47711	4.43333	3.13833	2.62551	3.64167	2.39667	2.16349
Loris tardigradus	DPC 042		2.63	0.966984	2.77	1.78	1.59546	3.11	2.28	1.9588
Loris tardigradus	BAA 153		3.3	1.19392	3.27	2.22	1.9823	2.83	2.39	1.91157
Loris tardigradus	BAA 152		3.25	1.17865	3.63	2.63	2.25622	3.6	2.44	2.17293
Loris tardigradus mean		3	3.06	1.11319	3.22333	2.21	1.94466	3.18	2.37	2.01443
Microcebus griseorufus	AMNH 174430		1.62	0.482426	1.51	1.66	0.918927	1.57	1.39	0.780379
Microcebus griseorufus	AMNH 174415		1.706	0.534151	1.71	1.32	0.814125	1.55	1.3	0.700619
Microcebus griseorufus	AMNH 174472		1.684	0.521172	1.57	1.36	0.75856	1.6	1.31	0.740031
Microcebus griseorufus	AMNH 174383		1.67	0.512824	1.73	1.5	0.953587	1.86	1.35	0.920681
Microcebus griseorufus mean		4	1.67	0.512643	1.63	1.46	0.8613	1.645	1.3375	0.785428
Mirza coquereli	DPC 0137		3.26	1.18173	2.72	2.66	1.97896	2.5	2.21	1.70928
Mirza coquereli	DPC 1139		3.15	1.1474	2.72	2.56	1.94064	2.92	2.07	1.79913
Mirza coquereli mean		2	3.205	1.16456	2.72	2.61	1.9598	2.71	2.14	1.75421
Nycticebus coucang	AMNH 90381		3.62	1.28647	3.96	2.68	2.36206	3.06	2.44	2.01041
Nycticebus coucang	DPC 040		4.18	1.43031	4.36	3.12	2.61031	3.8	2.86	2.38582
Nycticebus coucang	BAA 179		4.27	1.45161	4.71	3.37	2.7646	3.8	2.95	2.41681
Nycticebus coucang javanicus	AMNH 102027	1	3.97	1.37877	5.03	2.58	2.56321	3.1	2.3	1.96431
Nycticebus coucang mean		3	4.14	1.44096	4.7	3.02333	2.68745	3.56667	2.70333	2.40131
Nycticebus coucang menagensis	AMNH 16591	1	3.43	1.23256	2.71	3.84	2.34242	2.8	2.8	2.05924
Otolemur crassicaudatus	AMNH 216239		5.45	1.69562	5.93	4.26	3.22929	3.79	3.27	2.51716
Otolemur crassicaudatus	AMNH 216244		5.4	1.6864	5.9	4.41	3.25883	3.78	3.05	2.44487
Otolemur crassicaudatus mean		2	5.425	1.69101	5.915	4.335	3.24406	3.785	3.16	2.48101
Perodicticus potto	AMNH 184597		4.54	1.51293	4.75	3.71	2.86918	3.62	2.56	2.22648
Perodicticus potto	AMNH 269851		4.63	1.53256	4.5	3.3	2.698	3.6	2.8	2.31055
Perodicticus potto	AMNH 269907		5.04	1.61741	5.03	3.48	2.86245	3.55	2.72	2.26758
Perodicticus potto	AMNH 52698		4.38	1.47705	5.29	3.76	2.99024	3.21	2.72	2.1669
Perodicticus potto	AMNH 86898		3.77	1.32708	4.4	3.7	2.78994	3.59	2.98	2.37008
Perodicticus potto mean		5	4.472	1.4934	4.794	3.59	2.84196	3.514	2.756	2.26832
Prolemur simus	DPC 9925	1	6.76	1.91102	6.58	4.96	3.48544	5.77	5.26	3.4128
Propithecus diadema edwardsi	AMNH 100633	1	10.931	2.3916	9	7.5	4.21213	7.3	5.2	3.63653
Propithecus verrauxi coquereli	AMNH 208991		8.299	2.11614	7	5.7	3.68638	6.39	4.46	3.34988
Propithecus verreauxi mean		4	7.6155	1.97804	6.8435	5.4375	3.55648	5.7435	4.419	3.16688
Propithecus verreauxi verreauxi	AMNH 170491		8.02	2.08194	6.62	5.05	3.50948	5.76	3.81	3.08857
Propithecus verreauxi verreauxi	AMNH 170474		7.736	2.04588	6.95	5.19	3.58548	6.36	4.26	3.2993
Propithecus verreauxi verreauxi	DPC 052		8.29	2.11505	7.9	6.6	3.95393	6.55	4.67	3.42062
Ptilocercus lowii	YPM MAM 010179		--	--	1.44	1.09	0.450821	2.42	1.59	1.3475
Ptilocercus lowii	USNM 488061		--	--	--	--	--	2.59	1.76	1.51697
Ptilocercus lowii	USNM 488055		1.43	0.357674	1.36	1.19	0.481	2.54	1.81	1.52549
Ptilocercus lowii	USNM 488054		--	--	--	--	--	2.73	1.79	1.58652
Ptilocercus lowii	USNM 488059		--	--	--	--	--	2.54	1.75	1.49178
Ptilocercus lowii	USNM 488060		--	--	--	--	--	2.68	1.71	1.52231
Ptilocercus lowii	USNM 481106		1.45	0.371564	1.34	1.26	0.524	--	--	--
Ptilocercus lowii	USNM 488058		1.47	0.385262	1.37	1.12	0.428	--	--	--
Ptilocercus lowii mean		6,3,3	1.45	0.3715	1.3775	1.165	0.470955	2.58333	1.735	1.49843
Tarsius bancanus bancanus	AMNH 106754		3.358	1.21135	2.38	1.78	1.44371	2.67	2.41	1.86171
Tarsius bancanus bancanus	AMNH 106649		3.183	1.15782	2.34	1.72	1.39248	2.4	2.43	1.76336
Tarsius bancanus borneanus	AMNH 106010		3.274	1.18601	2.27	1.93	1.4773	2.91	2.63	2.03514
Tarsius bancanus mean		3	3.27167	1.18506	2.33	1.81	1.43783	2.66	2.49	1.88673
Tarsius spectrum	AMNH 109367		3.107	1.13366	2.52	1.91	1.57136	2.35	2.28	1.67859
Tarsius spectrum	AMNH 109369		3.1072	1.13372	2.42	2.04	1.59672	2.3	2.5	1.7492
Tarsius spectrum	AMNH 109368		3.222	1.17	2.45	1.85	1.51127	2.41	2.37	1.74252
Tarsius spectrum mean		3	3.1454	1.14579	2.46333	1.93333	1.55978	2.35333	2.38333	1.72344
Tarsius syrichta	AMNH 203296		3.203	1.16409	2.38	1.825	1.46868	2.64	2.38	1.83788
Tarsius syrichta	AMNH 203297		3.151	1.14772	2.26	1.91	1.46247	2.66	2.4	1.85379
Tarsius syrichta mean		2	3.177	1.1559	2.32	1.8675	1.46557	2.65	2.39	1.84584
Tupaia glis	YPM MAM 010169		2.74	1.00796	2.5	2.43	1.80418	3.37	2.41	2.09454
Tupaia glis	YPM MAM 010518		2.93	1.075	2.59	2.48	1.85992	3.27	2.23	1.98679
Tupaia glis	YPM MAM 010601		2.51	0.920283	2.32	2.3	1.67448	3.06	2.09	1.85558
Tupaia glis	YPM MAM 010602		2.83	1.04028	2.28	2.4	1.69964	3.28	2.33	2.03371
Tupaia glis mean		4	2.7525	1.01088	2.4225	2.4025	1.75955	3.245	2.265	1.99266
Varecia variegata mean		3	2.6975	0.99048	2.34083	2.3675	1.71123	3.195	2.22833	1.96065
Varecia variegata rubra	DPC 050		7.92	2.06939	8.18	6.31	3.94383	6.95	4.55	3.45387
Varecia variegata ssp.	AMNH 201384		7.931	2.07078	9.23	5.58	3.94165	6.8	4.75	3.47507
Varecia variegata variegata	AMNH 100512		8.443	2.13334	8.56	5.39	3.83165	7.19	5.06	3.59406
