# Supplementary material for: Primate tarsal bones from Egerkingen, Switzerland, attributable to the middle Eocene adapiform Caenopithecus lemuroides
Source: PeerJ. 2015 Jun 23;3:e1036. doi: 10.7717/peerj.1036 (PMC4485257; doi:10.7717/peerj.1036)
Supplement: Appendix S3 — Asterisks indicate which of the measurements were estimated on NMB En.270 due to abrasion or damage. More detailed explanations of how measurements are taken on digital models can be found in Boyer, Seiffert & Simons (2010). [file peerj-03-1036-s003.xlsx]

## Sheet: Sheet1
Higher taxon	Taxon	Catalogue Number	Maximum proximodistal length	Astragalar body proximodistal length	Astragalar head and neck proximodistal length	Fibular facet maximum dorsoplantar height	Fibular facet proximodistal length	Lateral tibial facet maximum proximodistal length along lateral margin	Lateral tibial facet maximum mediolateral width	Medial tibial facet maximum dorsoplantar height	Lateral tibial facet maximum proximodistal length along medial margin	Ectal facet proximodistal length	Ectal facet mediolateral width	Flexor fibularis groove mediolateral width	Flexor fibularis groove proximodistal length	Sustentacular facet proximodistal length	Sustentacular facet mediolateral width	Sustentacular facet width of contact with navicular facet	Maximum mediolateral diameter of astragalar head	Maximum dorsoplantar height of astragalar head	REDUCED GEOMETRIC MEAN (based on measurements 1-18)	Angle between fibular facet and lateral tibial facet	Angle between fibular facet and medial tibial facet	Angle between medial and lateral tibial facets	Angle between ectal facet and fibular facet	Angle between major axis of head and plane of lateral tibial facet
Adapisoriculidae	Deccanolestes hislopi	VPL/JU/NKIM/52	1.73	1.04	0.67	0.83	0.8	1.07	0.74	0.61	1.31	0.66	0.45	0.77	0.61	0.73	0.41	0.5	0.8	0.41	6.95	97	45	97	91	5
Adapisoriculidae	Deccanolestes robustus	VPL/JU/NKIM/51	2.52	1.34	0.89	1.1	1.2	1.51	0.94	1.02	1.95	0.98	0.64	1.28	0.93	1	0.59	0.58	1.2	0.81	10.19	118	58	102	93	-9
Cimolestidae	Procerberus formicarum	AMNH 117454	6.78	3.39	3.33	2.6	3.74	5.17	3.72	2.57	4.32	3.39	1.78	2.31	1.91	2.04	2.04	0.92	3.67	2.26	29.23	84	27	103	125	-10
Condylarthra	Protungulatum donnae	AMNH 118260	6.72	4.02	2.68	2.66	3.59	4.01	3.52	2.42	4.78	3.05	1.78	3.15	2.23	2.64	1.85	0.99	4.28	2.33	28.26	96	38	107	108	-5
Condylarthra	Protungulatum donnae	AMNH 11878	6.83	4.53	2.21	2.58	3.43	3.91	3.64	2.66	4.99	3.87	1.86	2.81	2	2.81	2.2	1.43	4.14	2.6	28.96	98	40	92	111	-11
Dermoptera	Cynocephalus volans	USNM 144662	10.51	7.35	2.48	3.98	5.66	6.8	4.7	4.33	10.48	4.79	2.09	4.25	4.27	3.65	2.14	2.45	4.59	3.64	43.01	103	18	95	105	8
Dermoptera	Cynocephalus volans	USNM 578084	10.84	9.18	1.67	3.78	6.24	7.19	5.52	4.39	10.74	5.12	2.02	3.65	3.96	3.88	2.64	2.94	5.38	3.89	44.51	108	13	92	112	7
Dermoptera	Cynocephalus volans	USNM 317118	11.07	8.63	2.55	4.23	5.73	7	5.67	3.7	10.08	4.56	2.19	2.87	3.77	3.65	2.22	2.4	4.78	4	41.94	99	14	97	113	12
Omomyiformes	Hemiacodon gracilis	AMNH 12613A	8.21	4.32	3.89	2.71	3.73	6.38	3.66	3.77	6.59	3.06	1.65	1.68	1.72	3.95	1.75	2.73	3.47	2.82	30.11	81	7	72	106	-8
Omomyiformes	Omomys carteri	UM 98648	6.66	3.17	3.44	2.39	3.35	4.03	2.61	2.66	4.26	2.72	1.45	1.07	1.43	2.74	1.32	1.48	2.91	2.27	23.03	74	6	68	99	2
Omomyiformes	Omomys carteri	UM 38321	6.91	3.5	3.39	2.36	3.26	4.46	2.69	2.41	4	2.87	1.45	1.11	1.35	2.77	1.01	1.85	2.66	2.17	22.97	72	6	74	102	-9
Anthropoidea	Callithrix pygmaea	SBU-C01	4.97	2.91	2.01	1.53	2.5	3.48	2.25	1.64	3.21	2.14	1	1.05	1.14	1.9	1.16	1.59	2.27	1.65	17.89	70	13	87	112	-5
Anthropoidea	Cebus apella	SBU-NCb04	18.47	11.82	6.66	6.51	10.94	14.61	7.68	6.72	14.72	8.46	4.24	4.46	3.21	7.77	4.03	6.53	7.95	6.12	70.86	78	8	85	117	-16
Anthropoidea	Saguinus oedipus	SBU-NSg06	8.84	5.17	3.53	2.84	4.81	7.11	3.77	2.5	6.56	3.79	1.93	2.01	2.12	4.03	2.12	2.64	3.69	2.75	33	70	17	85	115	-10
Anthropoidea	Saimiri sciureus	SBU-Nsm06	11.19	6.46	4.52	3.33	5.87	6.88	5.38	3.81	7.91	5.06	2.57	2.36	1.82	5.59	2.09	2.53	4.04	3.14	39.17	77	11	72	114	-11
Anthropoidea	Catopithecus browni	DPC 22844	11.08	6.98	4.04	3.48	6.02	7.44	5.2	3.5	8.6	4.44	2.56	2.24	2.14	3.88	2.8	2.3	4.6	3.78	39.82	77	14	83	113	-8
Tarsiidae	Tarsius syrichta carbonarius	AMNH 203296	6.38	3.76	2.65	1.68	3.01	3.74	3.22	2.29	5.12	3.07	1.09	1.46	0.66	2.29	1.93	1.92	2.8	1.85	22.15	83	16	61	110	6
Plesiadapiformes	Carpolestes simpsoni	UM 101963	4.7	2.97	1.86	1.95	2.44	2.83	2.14	1.25	3.09	2.17	1.13	1.3	1.27	2.31	1.3	1.58	2.64	1.57	17.78	82	34	80	86	27
Plesiadapiformes	Dryomomys szalayi	UM 41870	1.79	1.16	0.74	0.76	1.1	1.1	0.73	0.63	1.4	0.87	0.44	0.66	0.38	0.62	0.35	0.39	0.98	0.43	7.02	105	56	112	86	15
Plesiadapiformes	Ignacius graybullianus	USNM 442235	4.57	2.88	1.71	1.8	2.54	2.85	2.2	1.46	2.78	1.94	1.21	1.28	0.94	1.91	0.98	1.32	2.64	1.43	17.2	80	38	88	89	22
Plesiadapiformes	Nannodectes gidleyi	AMNH 17379	6.84	5.02	2.37	2.43	3.33	3.66	2.92	1.99	4.63	3.25	1.57	2.11	1.53	2.43	1.95	2.46	3.86	2.03	24.74	78	27	112	93	17
Plesiadapiformes	Plesiadapis cookei	UM 87990	13.02	8.14	4.64	4.9	6.8	7.25	5.62	3.4	8.4	5.47	2.92	4.96	4.47	5.72	2.9	3.5	6.94	3.68	48.69	84	22	115	93	14
Plesiadapiformes	Plesiadapis rex	UM 94816	7.94	5.51	2.46	3.39	4.1	5.43	3.86	3.01	6.32	3.49	2.71	2.97	2.44	2.98	2.39	2.99	4.79	2.27	33.79	92	43	116	93	18
Plesiadapiformes	Plesiadapis tricuspidens	MNHN BR 14537	11.05	7.24	4.16	4.54	6.52	7.35	5.51	3.17	8.42	5.48	3.08	3.48	3.08	4.21	2.78	2.91	6.45	3.54	44.99	81	40	119	87	16
Plesiadapiformes	Plesiadapis tricuspidens	MNHN unnumbered	9.97	7.47	3	4.07	5.82	6.75	4.89	4.24	7.75	4.95	2.92	3.2	3.06	3.91	2.81	2.46	5.35	3.58	42.71	89	35	116	91	21
Plesiadapiformes	Plesiadapis tricuspidens	MNHN R 5347	10.88	7.58	3.45	5.22	6.54	7.07	5.56	3.8	8.68	5.22	3.42	4.01	3.97	4.55	3.23	3.72	6.25	3.45	48.04	87	53	132	93	11
Plesiadapiformes	Plesiadapis tricuspidens	MNHN R 610	10.96	7.8	3.22	4.69	6.61	8.01	5.65	4	9.33	5.44	3.23	3.86	3.32	3.87	3.45	4.47	6.34	3.5	48.26	77	37	131	92	20
Plesiadapiformes	Purgatorius	UCMP 197509	3.34	2.31	1.25	1.46	1.75	2.25	1.53	1.13	2.57	1.65	1.03	1.32	0.86	1.27	0.96	1.12	1.93	0.95	13.94	99	49	114	88	14
Plesiadapiformes	Purgatorius	UCMP 197507	3.41	2.27	1.33	1.46	1.72	2.3	1.52	1.21	2.62	1.58	0.86	1.19	0.78	1.59	0.74	1.14	1.74	0.88	13.36	93	46	107	88	17
Plesiadapiformes	Tinimomys graybulliensis	USNM 461201	2.42	1.29	1.16	0.92	1.4	1.55	0.93	0.78	1.8	1.14	0.61	0.87	0.48	0.69	0.5	0.54	1.1	0.53	9.18	118	50	113	85	18
Scandentia	Ptilocercus lowii	USNM 488067	4.28	1.96	2.17	1.31	2.03	2.71	1.49	1.32	3.34	1.58	0.96	0.72	1.08	1.61	0.99	1.08	1.65	1.14	14.19	95	36	123	90	7
Scandentia	Ptilocercus lowii	USNM 488072	4.23	1.95	2.14	1.32	2.03	2.8	1.43	1.34	3.42	1.56	0.98	0.71	1.08	1.64	1.03	1.12	1.63	1.17	14.28	100	39	121	91	11
Scandentia	Ptilocercus lowii	USNM 488055	4.36	2.07	2.17	1.39	2.11	2.81	1.44	1.36	3.55	1.47	0.92	0.78	0.87	1.6	1	1.17	1.74	1.17	14.15	101	32	126	93	5
Scandentia	Tupaia belangeri	AMNH 113135	6.05	3.27	2.68	1.72	2.84	4.68	2.85	1.67	3.9	2.64	1.72	1.3	1.31	2.43	1.18	1.64	2.67	1.79	21.91	94	-1	56	105	-15
Scandentia	Tupaia glis	SBU coll.	6.06	3.69	2.2	1.67	2.59	4.02	3.09	1.7	3.59	2.47	1.67	0.99	1.48	2.47	1.02	1.69	2.79	1.69	20.7	72	6	87	105	-9
Scandentia	Urogale everetti	AMNH 203293	6.83	3.66	3.18	2.28	2.28	4.66	3.22	1.76	4.02	2.91	1.93	1.44	1.55	2.27	1.44	1.29	3.3	2.12	23.47	95	-5	62	104	2
Adapiformes	Leptadapis magnus	AMNH 127411	25.21	17.3	7.58	9.55	12.02	13.45	10.65	7.71	19.74	10.8	5.51	6.18	6.02	8.84	4.8	4.85	12.33	9.04	86.69	89	20	85	109	17
Adapiformes	Notharctus tenebrosus	AMNH 11474	16.64	10.7	5.96	6.23	7.97	8.79	7.33	5.77	14.81	7.2	2.81	3.96	2.6	5.55	3	3.24	6.95	5.52	55.66	93	18	80	94	15
Adapiformes	Adapis parisiensis	AMNH 111935	10.64	7.15	3.61	4.09	5.85	6.85	5.29	4.11	8.71	5.23	2.38	2.53	2.31	3.89	2.33	2.41	5.39	4.05	40.97	90	23	89	102	2
Adapiformes	Afradapis longicristatus	DPC 21445C	14.4	9.8	4.3	5	6.5	6.9	7.9	4.7	12	6	3.11	3.6	3.4	5.3	3	3.5	7	3.8	50.11	97	31	77	96	14
Adapiformes	Caenopithecus lemuroides	NMB En.270	-	9.53	-	6.35*	8.07*	9.52	6.25*	7.26	-	5.33	4.19	3.98*	4.01	-	3.27	-	-	-	58.23	97	29	78	87
Strepsirrhini	Cheirogaleus medius	DPC 0142	7.06	3.87	2.68	2.25	3.08	3.83	2.45	1.96	5.6	2.93	1.3	0.48	1.93	3.54	1.74	2.74	2.93	2.01	21.95	92	16	83	101	18
Strepsirrhini	Eulemur fulvus	DPC 095	14.83	9.23	4.78	4.66	8.2	9.66	5.91	4.51	12.31	6.58	2.75	3.09	3.91	5.15	3.83	3.39	5.73	5.09	53.1	98	26	75	111	-8
Strepsirrhini	Galago senegalensis	AMNH 86502	7.9	4.41	3.43	2.33	4.15	5.82	2.9	3.03	5.57	3.09	1.54	1.92	0.56	3.91	1.86	2.49	3.1	2.23	27.2	75	32	89	107	21
Strepsirrhini	Galago senegalensis	AMNH 83299	8.51	4.59	3.86	2.68	4.46	5.89	2.81	3.34	5.61	3.26	2.18	2.03	0.57	4.35	1.66	2.75	3.51	2.41	28.88	78	37	96	103	23
Strepsirrhini	Loris tardigradus	HTB 750	6.59	4.69	1.91	2.34	2.79	4.55	2.98	1.53	4.63	2.25	1.31	1.74	1.54	2.32	1.62	2.23	3.53	1.8	22.65	84	15	79	100	17
Strepsirrhini	Loris tardigradus	AMNH 150038	7.84	5.05	2.89	2.9	3.5	5.21	3.29	2.27	6.01	2.65	1.48	2.04	1.59	3.25	1.83	2.05	2.89	2.37	26.76	93	38	83	93	12
Strepsirrhini	Loris tardigradus	AMNH 165931	6.87	4.8	2.38	2.66	2.97	4.74	3.1	1.97	4.75	2.58	1.27	1.99	1.32	2.68	1.74	2.62	4.03	2.15	24.34	76	27	81	97	15
Strepsirrhini	Otolemur crassicaudatus	SBU 1163	13.67	8.25	4.75	4.26	7.76	10.76	5.79	4.7	11.85	5.71	2.97	3.29	2.7	6.32	3.44	3.95	5.62	4.61	51.38	92	27	69	103	14
Strepsirrhini	Propithecus sp.	DPC 051	22.21	12.97	6.8	6.12	10.52	12.04	7.83	6.18	18.89	8.7	4.53	5.31	5.01	7.76	5.86	6.91	8.88	6.72	72.1	98	26	67	102	-21
Strepsirrhini	Varecia variegata	DPC 049	20.31	11.98	7.13	7.32	10.23	12.35	7.65	6.13	17.37	8.04	3.82	3.9	4.33	7.76	4.99	7.46	8.79	6.67	68.76	91	20	70	103	14
