# Supplementary material for: Primate tarsal bones from Egerkingen, Switzerland, attributable to the middle Eocene adapiform Caenopithecus lemuroides
Source: PeerJ. 2015 Jun 23;3:e1036. doi: 10.7717/peerj.1036 (PMC4485257; doi:10.7717/peerj.1036)
Supplement: Appendix S4 — Values are provided for the input variables M2 Relief Index (RFI), M2 Orientation Patch Count (OPC), and M1 area (length x width; note that the same M1 area (i.e., the mean M1 area of all M1s associated with M2s) is used for each M2 of Afradapis and Caenopithecus, because associated M1s were not available for each M2 analyzed); the dietary classification for extant taxa (“Actual group”); the group predicted by the discriminant function analysis (“Predicted group (highest prob.)”); probability of classification into the group predicted by the discriminant function analysis (“Probability”); next-best classification predicted by the discriminant function analysis (“Second highest group”); probability of the next-best classification predicted by the discriminant function analysis (“Probability (Second highest group)”); and the discriminant function scores for the first three discriminant axes (“DF1”, “DF2”, “DF3”). Results are based on a stepwise discriminant function analysis (using the Mahalanobis distance method) run in SPSS v. 22; because Box’s M test was significant, classifications were based on the group covariance matrices of the canonical discriminant functions, not the original variables. 93.6% of the original grouped cases were classified correctly. See Winchester et al. (2014) for a recent summary of the RFI and OPC methods and their efficacy. [file peerj-03-1036-s004.xlsx]

## Sheet: Seiffert et al Caenopithecus Ap
Specimen	Taxon	Relief index	Orientation	m1 area	Actual group	Predicted group	Probability	Second	Probability (Second	DF1 score	DF2 score	DF3 score
number			Patch Count	(L*W)		(highest prob.)		highest group	highest group)
NMB Eh 396	Caenopithecus	0.48	54	3.29	ungrouped	folivore	0.851	omnivore	0.147	-0.577	1.956	0.326
NMB Eh 735	Caenopithecus Eh 735	0.5	63	3.29	ungrouped	folivore	0.992	omnivore	0.008	0.349	2.824	1.124
NMB Eh 597	Caenopithecus Eh 597	0.5	56	3.29	ungrouped	folivore	0.961	omnivore	0.039	0.042	2.127	0.37
NMB NN	Caenopithecus (no number)	0.48	68	3.29	ungrouped	folivore	0.996	omnivore	0.004	0.038	3.35	1.833
DPC 21500A	Afradapis longicristatus	0.54	51	3.05	ungrouped	folivore	0.989	omnivore	0.006	0.997	1.22	-0.384
DPC 21500B	Afradapis longicristatus	0.58	54	3.05	ungrouped	folivore	0.991	insectivore	0.009	2.189	1.462	-0.402
DPC 21500C	Afradapis longicristatus	0.58	54	3.05	ungrouped	folivore	0.991	insectivore	0.009	2.189	1.462	-0.402
AMNH 207949	Arctocebus calabarensis	0.67	51	2.06	insectivore	insectivore	0.924	folivore	0.076	4.912	-0.414	-0.974
MCZ 38316	Arctocebus calabarensis	0.61	49	2	insectivore	insectivore	0.987	folivore	0.013	3.262	-0.615	-0.645
AMNH 212954	Arctocebus calabarensis	0.56	43	2.08	insectivore	insectivore	0.77	frugivore	0.143	1.634	-1.024	-0.906
USNM 377375	Arctocebus calabarensis	0.54	45	2.3	insectivore	frugivore**	0.602	folivore	0.248	1.088	-0.475	-0.636
USNM 511930	Arctocebus calabarensis	0.6	46	2.33	insectivore	insectivore	0.868	folivore	0.132	2.709	-0.417	-1.056
USNM 83650	Avahi laniger	0.61	60	2.68	folivore	folivore	0.815	insectivore	0.185	3.423	1.475	0.182
USNM 83652	Avahi laniger	0.59	55	2.68	folivore	folivore	0.769	insectivore	0.231	2.673	1.006	-0.186
AMNH 41267	Avahi laniger	0.56	56	2.47	folivore	folivore	0.586	insectivore	0.414	2.021	0.841	0.289
AMNH 170461	Avahi laniger	0.53	52	2.53	folivore	folivore	0.898	insectivore	0.071	1.021	0.573	0.083
AMNH 170461	Avahi laniger	0.54	57	2.47	folivore	folivore	0.786	insectivore	0.212	1.534	0.969	0.567
AMNH 100635	Avahi laniger	0.62	54	2.63	folivore	folivore	0.646	insectivore	0.354	3.448	0.79	-0.523
AMNH 100830	Cheirogaleus spp.	0.37	48	2.18	omnivore	omnivore	1	frugivore	0	-3.233	-0.108	1.202
AMNH 80072	Cheirogaleus spp.	0.33	43	2.27	omnivore	omnivore	1	folivore	0	-4.555	-0.418	0.958
AMNH 80072	Cheirogaleus spp.	0.34	45	2.25	omnivore	omnivore	1	folivore	0	-4.193	-0.262	1.099
AMNH 100640	Cheirogaleus spp.	0.35	35	2.18	omnivore	omnivore	1	folivore	0	-4.334	-1.375	-0.027
AMNH 100640	Cheirogaleus spp.	0.34	35	2.15	omnivore	omnivore	1	folivore	0	-4.585	-1.404	0.075
AMNH 100654	Cheirogaleus spp.	0.36	38	1.77	omnivore	omnivore	1	frugivore	0	-3.743	-1.69	0.426
AMNH 196618	Cheirogaleus spp.	0.35	50	1.92	omnivore	omnivore	1	frugivore	0	-3.552	-0.261	1.725
AMNH 196618	Cheirogaleus spp.	0.33	37	1.97	omnivore	omnivore	1	folivore	0	-4.677	-1.454	0.47
AMNH 100632	Daubentonia madagascariensis	0.35	46	2.48	omnivore	omnivore	1	folivore	0	-3.993	0.16	1
AMNH 100632	Daubentonia madagascariensis	0.37	56	2.49	omnivore	omnivore	0.999	folivore	0.001	-3.028	1.142	1.901
AMNH 41334	Daubentonia madagascariensis	0.38	50	2.7	omnivore	omnivore	0.999	folivore	0.001	-3.125	0.837	1.059
AMNH 41334	Daubentonia madagascariensis	0.36	53	2.69	omnivore	omnivore	0.999	folivore	0.001	-3.52	1.15	1.558
AMNH 185643	Daubentonia madagascariensis	0.36	40	2.57	omnivore	omnivore	1	folivore	0	-4.033	-0.32	0.221
SBU coll.	Daubentonia madagascariensis	0.36	35	2.5	omnivore	omnivore	1	folivore	0	-4.22	-0.921	-0.28
AMNH 100569	Eulemur fulvus	0.47	44	3.16	frugivore	frugivore	0.654	omnivore	0.245	-1.219	0.784	-0.597
AMNH 41264	Eulemur fulvus	0.52	39	3.22	frugivore	frugivore	0.787	folivore	0.195	-0.141	0.302	-1.594
AMNH 100517	Eulemur fulvus	0.51	38	3.01	frugivore	frugivore	0.879	folivore	0.107	-0.351	-0.09	-1.506
AMNH 19159	Eulemur fulvus	0.5	41	3.22	frugivore	frugivore	0.833	folivore	0.119	-0.584	0.53	-1.208
AMNH 41268	Eulemur fulvus	0.54	39	3.18	frugivore	frugivore	0.547	folivore	0.447	0.408	0.215	-1.744
AMNH 18696	Eulemur fulvus	0.52	34	3.12	frugivore	frugivore	0.727	folivore	0.254	-0.313	-0.342	-2.08
USNM 083961	Eulemur fulvus	0.46	42	3.15	frugivore	frugivore	0.608	omnivore	0.343	-1.567	0.585	-0.722
AMNH 236379	Sciurocheirus alleni	0.53	49	2.04	frugivore	frugivore	0.438	insectivore	0.418	1.121	-0.442	0.017
AMNH 236348	Sciurocheirus alleni	0.5	44	2	frugivore	frugivore	0.993	folivore	0.006	0.125	-0.956	-0.244
AMNH 241119	Sciurocheirus alleni	0.53	44	1.86	frugivore	frugivore	0.876	insectivore	0.108	0.987	-1.204	-0.427
AMNH 119810	Galagoides demidoff	0.59	48	0.8	insectivore	insectivore	0.999	frugivore	0.001	3.255	-2.442	0.048
AMNH 241124	Galagoides demidoff	0.59	48	1	insectivore	insectivore	1	frugivore	0	3.16	-2.15	-0.057
AMNH 239438	Galagoides demidoff	0.56	52	1.12	insectivore	insectivore	0.996	frugivore	0.003	2.483	-1.533	0.567
AMNH 241122	Galagoides demidoff	0.59	50	1.12	insectivore	insectivore	1	folivore	0	3.191	-1.775	0.096
AMNH 187359	Galago senegalensis	0.57	51	1.63	insectivore	insectivore	0.997	folivore	0.003	2.463	-0.9	0.106
AMNH 187360	Galago senegalensis	0.6	46	1.48	insectivore	insectivore	0.999	folivore	0.001	3.111	-1.661	-0.61
USNM 063355	Hapalemur griseus	0.5	60	2.71	folivore	folivore	0.968	omnivore	0.03	0.491	1.676	1.106
USNM 063356	Hapalemur griseus	0.48	53	2.71	folivore	folivore	0.698	omnivore	0.239	-0.346	1.008	0.523
USNM 084386	Hapalemur griseus	0.46	48	2.67	folivore	frugivore**	0.568	omnivore	0.333	-1.077	0.48	0.176
USNM 317966	Hapalemur griseus	0.5	52	2.75	folivore	folivore	0.863	omnivore	0.07	0.121	0.938	0.223
USNM 083668	Hapalemur griseus	0.5	43	2.69	folivore	frugivore**	0.923	folivore	0.068	-0.245	-0.046	-0.714
BMNH 84.10.20.4	Prolemur simus	0.5	85	3.36	folivore	folivore	1	omnivore	0	1.281	5.117	3.456
J.J. pers coll	Prolemur simus	0.49	63	3.18	folivore	folivore	0.986	omnivore	0.014	0.136	2.677	1.267
AMNH 100503	Indri indri	0.53	53	3.75	folivore	folivore	0.98	omnivore	0.02	0.488	2.458	-0.451
AMNH 100503	Indri indri	0.52	52	3.75	folivore	folivore	0.963	omnivore	0.036	0.179	2.373	-0.473
AMNH 185638	Indri indri	0.49	54	3.79	folivore	folivore	0.936	omnivore	0.063	-0.548	2.673	-0.023
AMNH 100504	Indri indri	0.54	47	3.73	folivore	folivore	0.942	omnivore	0.034	0.5	1.817	-1.172
AMNH 170737	Lemur catta	0.45	44	2.88	frugivore	frugivore	0.521	omnivore	0.441	-1.617	0.403	-0.279
AMNH 100598	Lemur catta	0.52	38	2.91	frugivore	frugivore	0.848	folivore	0.146	-0.038	-0.251	-1.539
AMNH 100821	Lemur catta	0.48	38	2.97	frugivore	frugivore	0.875	omnivore	0.082	-1.127	-0.106	-1.229
AMNH 170743	Lemur catta	0.5	42	2.83	frugivore	frugivore	0.908	folivore	0.078	-0.355	0.059	-0.896
AMNH 170740	Lemur catta	0.46	39	2.82	frugivore	frugivore	0.756	omnivore	0.22	-1.543	-0.197	-0.872
AMNH 170741	Lemur catta	0.46	38	2.93	frugivore	frugivore	0.665	omnivore	0.307	-1.639	-0.136	-1.037
AMNH 150062	Loris tardigradus	0.6	50	1.79	insectivore	insectivore	0.996	folivore	0.004	3.14	-0.809	-0.342
AMNH 240827	Loris tardigradus	0.6	57	1.87	insectivore	insectivore	0.992	folivore	0.008	3.409	0.005	0.37
AMNH 217303	Loris tardigradus	0.58	55	1.89	insectivore	insectivore	0.989	folivore	0.011	2.781	-0.136	0.315
AMNH 165931	Loris tardigradus	0.57	46	1.92	insectivore	insectivore	0.973	folivore	0.019	2.107	-0.974	-0.585
AMNH 174530	Microcebus griseorufus	0.5	42	0.64	frugivore	frugivore	1	insectivore	0	0.68	-3.145	0.255
AMNH 174533	Microcebus griseorufus	0.47	49	0.63	frugivore	frugivore	1	insectivore	0	0.196	-2.42	1.27
AMNH 174534	Microcebus griseorufus	0.5	48	0.8	frugivore	frugivore	0.999	insectivore	0.001	0.868	-2.314	0.817
AMNH 174498	Microcebus griseorufus	0.44	45	0.83	frugivore	frugivore	1	omnivore	0	-0.87	-2.483	0.991
AMNH 174483	Microcebus griseorufus	0.48	48	0.66	frugivore	frugivore	1	insectivore	0	0.403	-2.49	1.062
AMNH 174531	Microcebus griseorufus	0.47	43	0.72	frugivore	frugivore	1	insectivore	0	-0.11	-2.886	0.577
AMNH 174489	Microcebus griseorufus	0.49	47	0.72	frugivore	frugivore	1	insectivore	0	0.596	-2.516	0.837
AMNH 100832	Mirza coquereli	0.49	43	1.88	frugivore	frugivore	0.998	folivore	0.002	-0.128	-1.217	-0.203
AMNH 100832	Mirza coquereli	0.48	43	1.87	frugivore	frugivore	0.998	folivore	0.001	-0.388	-1.217	-0.113
MCZ 45126	Mirza coquereli	0.44	45	1.91	frugivore	frugivore	0.935	omnivore	0.063	-1.38	-0.902	0.423
AMNH 183827	Nycticebus bengalensis	0.48	47	2.39	frugivore	frugivore	0.931	folivore	0.043	-0.458	-0.058	0.045
AMNH 87279	Nycticebus bengalensis	0.49	44	2.48	frugivore	frugivore	0.961	folivore	0.031	-0.367	-0.239	-0.411
AMNH 164442	Nycticebus bengalensis	0.5	53	2.43	frugivore	folivore**	0.805	frugivore	0.127	0.316	0.569	0.499
AMNH 106650	Nycticebus coucang	0.49	51	2.13	frugivore	frugivore	0.843	folivore	0.128	0.105	-0.054	0.527
AMNH 106653	Nycticebus coucang	0.44	45	2.4	frugivore	frugivore	0.621	omnivore	0.368	-1.612	-0.185	0.166
SBU PNc-01	Nycticebus coucang	0.47	48	2.37	frugivore	frugivore	0.885	omnivore	0.069	-0.67	0.027	0.248
AMNH 269860	Perodicticus potto	0.44	59	2.47	omnivore	omnivore	0.779	folivore	0.221	-1.03	1.311	1.636
AMNH 269860	Perodicticus potto	0.44	54	2.51	omnivore	omnivore	0.873	folivore	0.106	-1.269	0.872	1.077
AMNH 241117	Perodicticus potto	0.48	52	2.22	omnivore	frugivore**	0.66	folivore	0.232	-0.159	0.191	0.672
AMNH 31252	Perodicticus potto	0.45	46	2.48	omnivore	frugivore**	0.721	omnivore	0.256	-1.34	0.017	0.146
AMNH 269907	Perodicticus potto	0.44	49	2.02	omnivore	frugivore**	0.741	omnivore	0.252	-1.257	-0.343	0.796
AMNH 100829	Phaner furcifer	0.46	47	1.68	frugivore	frugivore	0.997	omnivore	0.003	-0.653	-1.068	0.589
AMNH 100829	Phaner furcifer	0.47	45	1.58	frugivore	frugivore	0.999	omnivore	0	-0.428	-1.428	0.34
MCZ 44953	Phaner furcifer	0.49	46	1.62	frugivore	frugivore	0.999	insectivore	0.001	0.127	-1.299	0.256
AMNH 100633	Propithecus diadema	0.53	54	3.52	folivore	folivore	0.986	omnivore	0.014	0.641	2.221	-0.222
AMNH 17356	Propithecus diadema	0.51	49	3.39	folivore	folivore	0.869	omnivore	0.075	-0.048	1.561	-0.522
USNM 63349	Propithecus diadema	0.59	50	3.65	folivore	folivore	0.999	omnivore	0.001	1.995	1.927	-1.234
USNM 63351	Propithecus edwardsi	0.57	51	3.56	folivore	folivore	0.997	omnivore	0.003	1.551	1.924	-0.908
AMNH 16699	Propithecus verreauxi	0.57	49	3.37	folivore	folivore	0.997	omnivore	0.002	1.553	1.446	-1.023
AMNH 100827	Propithecus verreauxi	0.54	43	3.36	folivore	folivore	0.72	frugivore	0.264	0.499	0.877	-1.408
USNM 257397	Propithecus verreauxi	0.56	48	3.42	folivore	folivore	0.993	omnivore	0.004	1.22	1.434	-1.072
AMNH 106649	Tarsius bancanus	0.59	51	1.74	insectivore	insectivore	0.997	folivore	0.003	2.942	-0.768	-0.122
AMNH 106754	Tarsius borneanus	0.56	59	1.84	insectivore	insectivore	0.984	folivore	0.016	2.45	0.218	0.943
AMNH 109368	Tarsius spectrum	0.57	59	1.69	insectivore	insectivore	0.995	folivore	0.005	2.786	-0.016	0.936
AMNH 109366	Tarsius spectrum	0.56	70	1.62	insectivore	insectivore	0.987	folivore	0.013	3.037	0.992	2.243
AMNH 196485	Tarsius spectrum	0.56	60	1.58	insectivore	insectivore	0.996	folivore	0.004	2.617	-0.063	1.187
AMNH 196480	Tarsius spectrum	0.58	59	1.75	insectivore	insectivore	0.994	folivore	0.006	3.023	0.058	0.819
AMNH 166856	Tarsius syrichta	0.55	59	1.9	insectivore	insectivore	0.965	folivore	0.035	2.156	0.32	0.996
AMNH 203297	Tarsius syrichta	0.54	59	1.75	insectivore	insectivore	0.979	folivore	0.021	1.962	0.115	1.161
AMNH 187935	Tarsius syrichta	0.59	63	1.82	insectivore	insectivore	0.988	folivore	0.012	3.431	0.544	1.128
AMNH 100514	Varecia variegata	0.42	31	3.72	omnivore	omnivore	0.998	folivore	0.001	-3.381	0.38	-1.864
AMNH 100513	Varecia variegata	0.41	39	3.71	omnivore	omnivore	0.981	frugivore	0.013	-3.29	1.177	-0.912
AMNH 18041	Varecia variegata	0.46	37	3.71	omnivore	omnivore	0.585	frugivore	0.386	-2.052	0.906	-1.555
AMNH 17338	Varecia variegata	0.45	30	3.36	omnivore	omnivore	0.979	frugivore	0.012	-2.459	-0.289	-2.039
AMNH 100512	Varecia variegata	0.44	37	3.79	omnivore	omnivore	0.861	frugivore	0.126	-2.62	1.052	-1.426
USNM 84382	Varecia variegata	0.45	35	3.6	omnivore	omnivore	0.848	frugivore	0.137	-2.353	0.56	-1.627
USNM x	Varecia variegata	0.46	38	3.68	omnivore	omnivore	0.534	frugivore	0.433	-1.994	0.962	-1.431
